# Supplementary material for: Surface Pd-rich PdAg nanowires as highly efficient catalysts for dehydrogenation of formic acid and subsequent hydrogenation of adiponitrile
Source: Royal Society of Chemistry journal article supplement (doi:10.1039/c8ta06513f), 2018-01-01
Supplement: c8ta06513f1.pdf [file c8ta06513f1.pdf]

### *Electronic Supplementary Information for:*

#### **Surface Pd-Rich PdAg Nanowires as Highly Efficient Catalysts for Dehydrogenation of Formic Acid and Subsequent Hydrogenation of Adiponitrile**

Hu Liu<sup>1,2#</sup>, Guo Yong<sup>3#</sup>, Yongsheng Yu<sup>1,2\*</sup>, Weiwei Yang<sup>2\*</sup>, Mengqi Shen<sup>4</sup>, Xinyang Liu<sup>2</sup>, Shuo Geng<sup>2</sup>, Junrui Li<sup>4</sup>, Chao Yu<sup>4</sup>, Zhouyang Yin<sup>4</sup> and Haibo Li<sup>1</sup>

<sup>1</sup> Key Laboratory of Functional Materials Physics and Chemistry of the Ministry of Education, Jilin Normal University, Changchun 130103, China

<sup>2</sup> MIIT Key Laboratory of Critical Materials Technology for New Energy Conversion and Storage, School of Chemistry and Chemical Engineering, Harbin Institute of Technology, Harbin, Heilongjiang 150001, China

<sup>3</sup> Key laboratory of material and technology for clean energy, ministry of education; Key laboratory of advanced functional materials, autonomous region; Institute of Applied Chemistry, Xinjiang University, Urumqi, Xinjiang 830046, China

<sup>4</sup> Department of Chemistry, Brown University, Providence, Rhode Island 02912, USA

# These authors contribute equally.

*\*To whom correspondence should be addressed. Email:*

[yangww@hit.edu.cn](mailto:yangww@hit.edu.cn) and [ysyu@hit.edu.cn](mailto:ysyu@hit.edu.cn)

## **1. Supplementary Materials and Methods**

**1.1 Chemicals and Materials:** Silver nitrate ( $\text{AgNO}_3$ ), palladium (II) nitrate dihydrate ( $\text{Pd}(\text{NO}_3)_2 \cdot 2\text{H}_2\text{O}$ ), 1,6-hexanedinitrile, formic acid ( $\text{HCOOH}$ ) and poly-*n*-vinylpyrrolidone (PVP,  $M_w = 58,000$ ) were purchased from Aldrich Company USA. The distilled water ( $18 \text{ M}\Omega/\text{cm}$ ) was supplied by a Water Purifier Nanopure water system. Sodium hydroxide (NaOH, A. R. grade, Tianjin Chemical Reagent), sodium sulphide ( $\text{Na}_2\text{S}$ , A. R. grade, Tianjin Chemical Reagent), 1, 3-butylene glycol (1, 3-BG, A. R. grade, Tianjin Chemical Reagent), ethylene glycol (EG, A. R. grade, Tianjin Chemical Reagent) were used as received without further purification.

**1.2 Synthesis of diffused-induced PdAg NWs(D-PdAg NWs):** In a typical polyol process, PVP (1.2 mmol, 133.2 mg,  $M_w = 58,000$ , as calculated in terms of the repeating unit) and 10 mL 1, 3-BG were added into a 50 mL two-neck flask heated with an oil bath at  $170 \text{ }^\circ\text{C}$  for 10 min. Then 0.5 mL ammonium hydroxide (25 %) was then quickly added into the above 1, 3-BG solution using a pipette with immediately sealing the exit of two-neck flask and reflux pipe. After refluxing for 2 h, the clear solution turns yellow, and opened above reaction system with refluxing for 0.5 h at  $170 \text{ }^\circ\text{C}$  to remove ammonium hydroxide and water. Then 0.5 mL  $\text{Na}_2\text{S}$  solution (1

mM in EG) was then quickly added into the 1, 3-BG solution. After 5 min, AgNO<sub>3</sub> (0.1 mmol, 16.99 mg) were dissolved into 2 mL of distilled water at room temperature, and then the solution was rapidly quickly added into the stirring 1, 3-BG solution using a syringe. When above solution was refluxing for 0.5 h, the 2 mL aqueous solution including Pd(NO<sub>3</sub>)<sub>2</sub>·2H<sub>2</sub>O (0.1 mmol, 26.64 mg) were rapidly quickly added into the stirring above solution and was refluxing for another 2 h. Refluxing and stirring was always continuing during throughout the synthesis process. After the reaction system was cooled to room temperature, the black production was washed by 60 mL acetone for the first centrifugal process at a rate of 8500 rpm for 3 min. The as-synthesized D-Ag<sub>5</sub>Pd<sub>5</sub> NWs were further purified at least three times with 60 mL acetone and 3 mL water. The final black precipitation was redispersed into 9.6 mL water for further catalyst evaluation. For the other composition networked D-AgPd NWs were synthesized by same method by controlling metal Ag and Pd precursor ratios (7:3 and 3:7) respectively. Ag NPs were prepared by same method with refluxing for 0.5 h. The co-reducing Pd<sub>5</sub>Ag<sub>5</sub> NWs (C-Pd<sub>5</sub>Ag<sub>5</sub> NWs) were synthesized by our reported method. [1]

**1.3 D-PdAg NWs Characterizations:** X-ray diffraction (XRD) characterization was carried out on a Bruker AXS D8-Advanced diffractometer with Cu K $\alpha$  radiation ( $\lambda = 1.5418 \text{ \AA}$ ). The composition analyses of the samples were carried on FEI Nova Nano SEM450 with energy dispersive spectroscopy (EDS). Samples for TEM analysis were prepared by depositing a single drop of diluted networked D-PdAg NWs catalyst dispersion in ethanol on amorphous carbon coated copper grids. TEM images were obtained with a Philips CM 20 operating at 120 kV. High-resolution TEM (HRTEM) and the high-angle annular dark field (HAADF) images were obtained on a Fei Tecnai Osiris with an accelerating voltage of 200 kV. X-ray photoelectron spectroscopy (XPS) measurement was performed on an ESCALAB-MKII spectrometer (Thermo Fisher Scientific) with Al K $\alpha$  X-ray radiation as the X-ray source for excitation. The UV/Vis spectra were recorded on a Perkin Elmer Lambda 35 spectrometer. Infrared spectra were recorded on a Bruker Tensor 27 FTIR spectrometer. Detailed analyses for CO<sub>2</sub>, H<sub>2</sub>, N<sub>2</sub> and CO were performed on GC-6890 with thermal conductivity detector (TCD) and flame ionization detector (FID)-Methanator (detection limit for CO:  $\sim 2$  ppm). The progress of the reaction and the yield of the 1, 6-hexanediamine were determined by GC-MS with benzyl ether as the internal standard. The sample solution (0.2 ML) was directly injected into the GC for quantitative analysis. <sup>1</sup>H NMR spectra were performed on an INOVA-400 NMR spectrometer with CDCl<sub>3</sub>-d<sub>6</sub> as solvent.

**1.4 D-PdAg NWs Catalyst Evaluation:** 1) The catalytic activity of the composition D-PdAg NWs and Ag NPs catalysts for FA dehydrogenation in water was determined by measuring the rate of gas (CO<sub>2</sub> + H<sub>2</sub>) evolved in a typical gas burette system.

Before the test, a two-neck round bottom flask (25 mL) containing a teflon-coated stir bar and 9.6 mL aqueous dispersed catalyst (0.1 mmol) were placed on a magnetic stirrer and thermostated to a desired temperature value. One neck of the flask was connected to a gas burette, and the other neck was sealed rubber stopper. Next, the aqueous dispersion of D-PdAg NWs catalyst was stirred with magnetic stirring (600 r/min) at least 15 min in the reaction flask for keeping a constant temperature condition. Finally, when the desired amount of FA was rapidly injected into the flask using a syringe from the rubber stopper neck under a 600 rpm stirring rate, the gas volume generated was recorded at certain time intervals.

2) The reduction experiments of 1, 6-hexanedinitrile were conducted in a two-neck round bottom flask (25 mL) at 25 °C. In the setup, before the test, a two-neck round bottom flask (25 mL) containing a teflon-coated stir bar and 9.3 mL aqueous dispersed catalyst (0.1 mmol) were placed on a magnetic stirrer and thermostated to a desired temperature value under magnetic stirring (600 r/min) at least 15 min. One neck of the flask was connected to a balloon, and the other neck was sealed rubber stopper. Then, 0.2 mL FA and 0.5 mL 1, 6-hexanedinitrile ethanol solution (5 mol/L) were rapidly rejected into the flask using a syringe from the rubber stopper neck, respectively. During the experiment, we extracted 0.5 mL suspension from catalytic system at the regular time interval. The D-AgPd NWs catalyst was separated from the suspension by centrifugation, and the yield of the 1, 6-hexanedinitrile were determined by GC-MS with benzyl ether as the internal standard. The sample solution (0.2 ML) was directly injected into the GC for quantitative analysis. The CO<sub>2</sub> and H<sub>2</sub> were performed on GC-6890.

**1.5 CO<sub>2</sub> Removal from H<sub>2</sub>/CO<sub>2</sub> Mixture:** The molar ratio of CO<sub>2</sub>/H<sub>2</sub> was tested through a NaOH trap and the CO<sub>2</sub> was absorbed.<sup>[2]</sup> In the experiment, the gas burette system was modified by placing a trap (10 M NaOH solution) between the reaction flask and gas burette. The generated gas mixture was passed the NaOH trap and the CO<sub>2</sub> was captured. The volume of gas generated from with NaOH trap was compared with the volume of gas generated from without NaOH trap in FA (1 M, 10 mL) hydrogen generation system in water.

## 2. Supplementary figures and tables

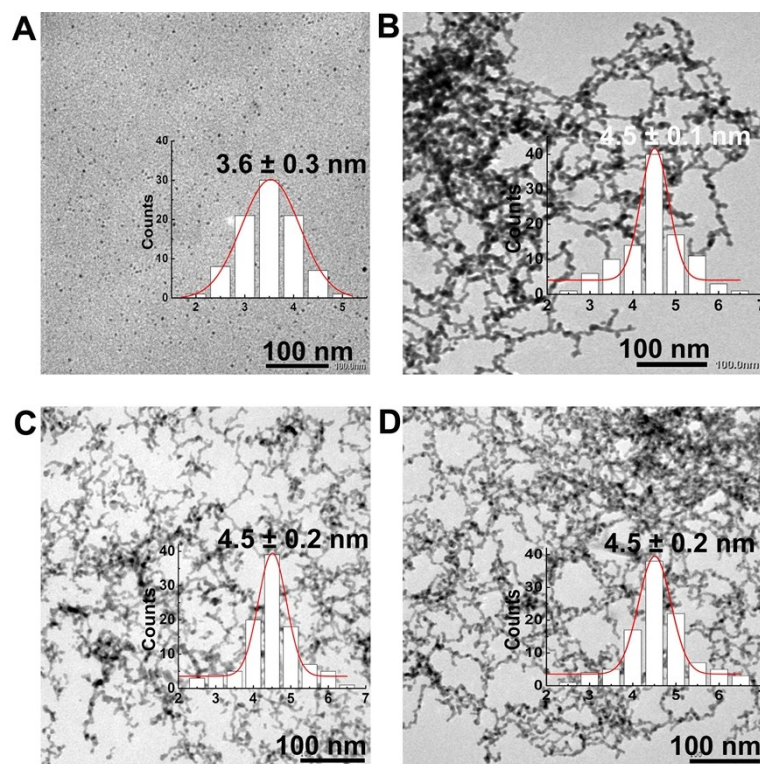

**Figure S1** TEM images of (A) Ag NPs, (B) Pd-NWs, (C) D-Pd<sub>7</sub>Ag<sub>3</sub> NWs, (D) D-Pd<sub>3</sub>Ag<sub>7</sub> NWs.

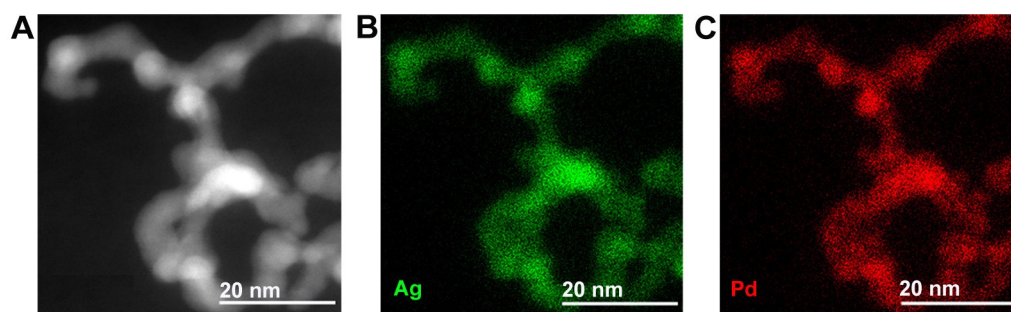

**Figure S2** (A-C) HAADF-STEM and elemental mapping of the networked D-Pd<sub>5</sub>Ag<sub>5</sub> NWs.

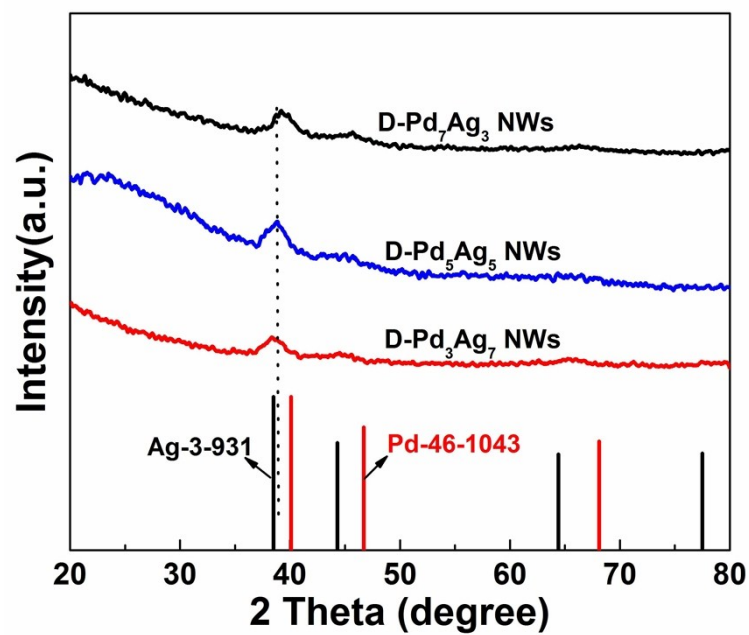

Figure S3 XRD patterns of D-Pd<sub>7</sub>Ag<sub>3</sub> NWs, D-Pd<sub>5</sub>Ag<sub>5</sub> NWs and D-Pd<sub>3</sub>Ag<sub>7</sub> NWs.

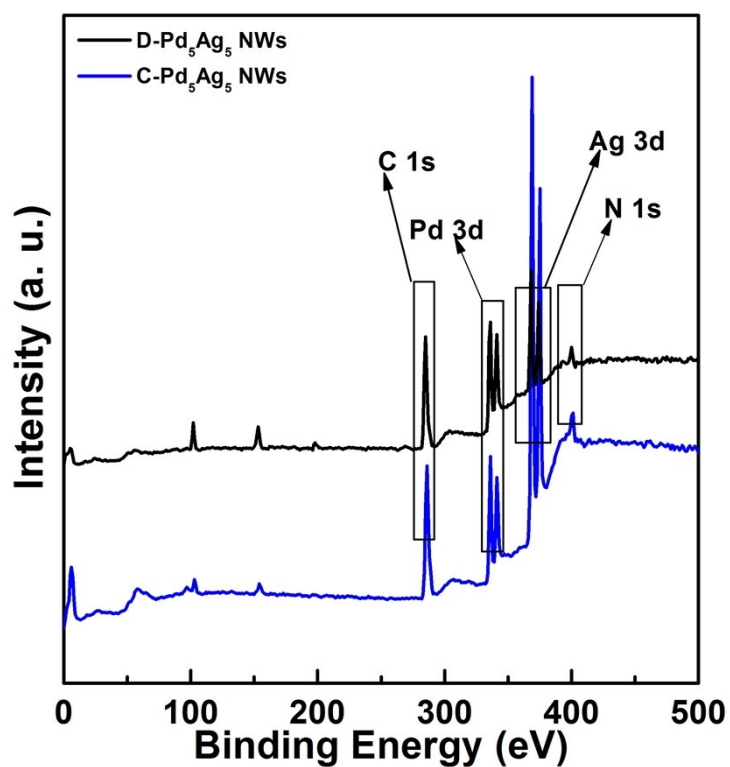

Figure S4 XPS spectrum of D-Pd<sub>5</sub>Ag<sub>5</sub> NWs and C-Pd<sub>5</sub>Ag<sub>5</sub> NWs.

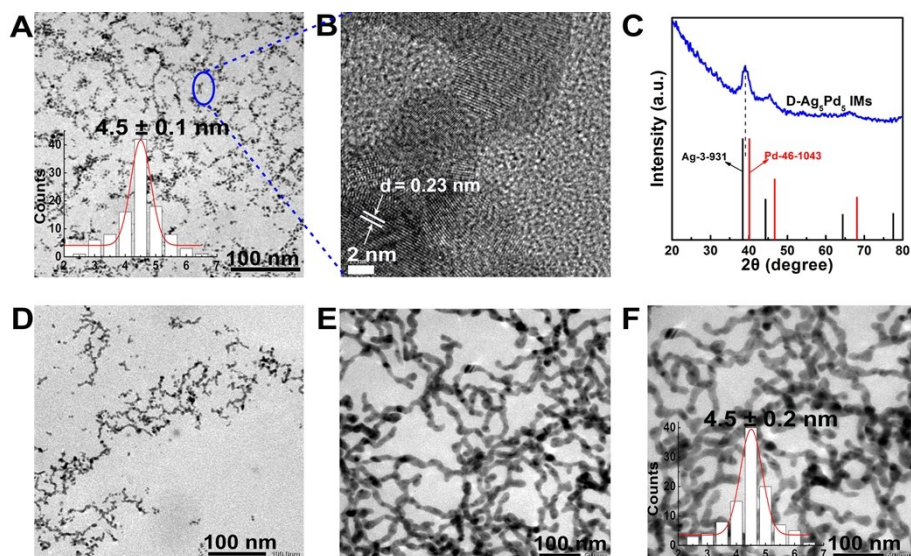

**Figure S5** Typical TEM images of intermediates for synthesizing the networked D-Pd<sub>5</sub>Ag<sub>5</sub> NWs at different reaction time: (A) 15 s, (D) 1 min, (E) 20 min and (F) 3 h. (B) HRTEM image and diffraction profile of the D-Pd<sub>5</sub>Ag<sub>5</sub> IMs (the growth intermediates of D-Pd<sub>5</sub>Ag<sub>5</sub> NWs) at 15 s. (C) XRD patterns of D-Pd<sub>5</sub>Ag<sub>5</sub> IMs at 15 s.

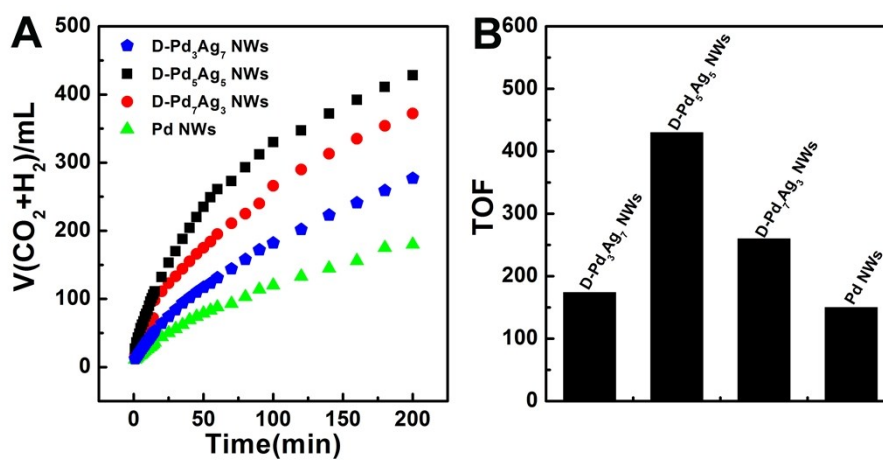

**Figure S6** (A) The volume of CO<sub>2</sub>+H<sub>2</sub> generated vs. time from FA hydrogen generation system in the presence of the different D-PdAg NWs and Pd NWs in water at 25 °C and (B) TOF of the different D-PdAg NWs and Pd NWs.

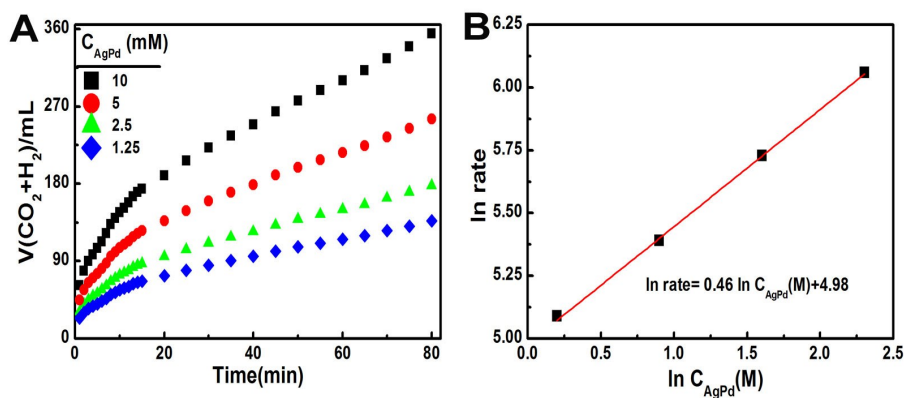

**Figure S7** (A) Gas generated vs. time during the dehydrogenation of aqueous FA solution (10 mL, 1 M) in the presence of different catalyst concentration at 25 °C, and (B) plot of hydrogen generation rate vs. D-Pd<sub>5</sub>Ag<sub>5</sub> NWs concentration.

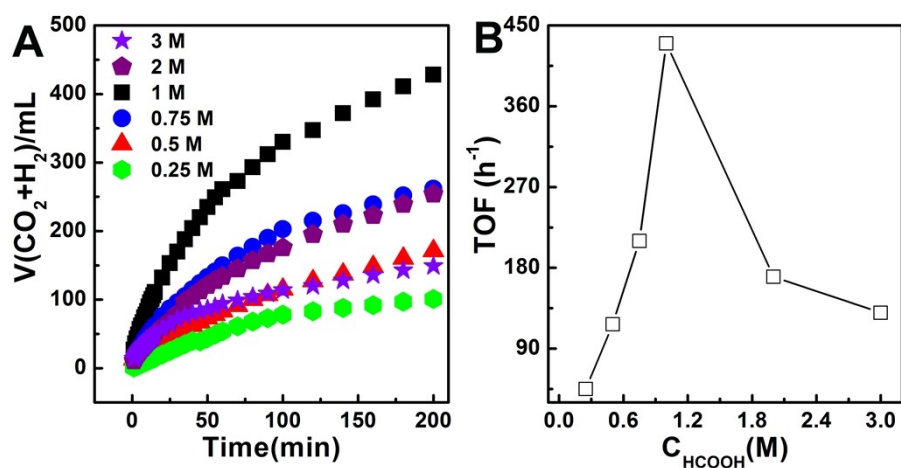

**Figure S8** A) The plots of generated gas ( $\text{CO}_2 + \text{H}_2$ ) vs. time for the FA dehydrogenation catalyzed by D-Pd<sub>5</sub>Ag<sub>5</sub> NWs at different FA concentrations and B) the plot of gas generation rate vs. FA concentration (both in logarithmic scale).

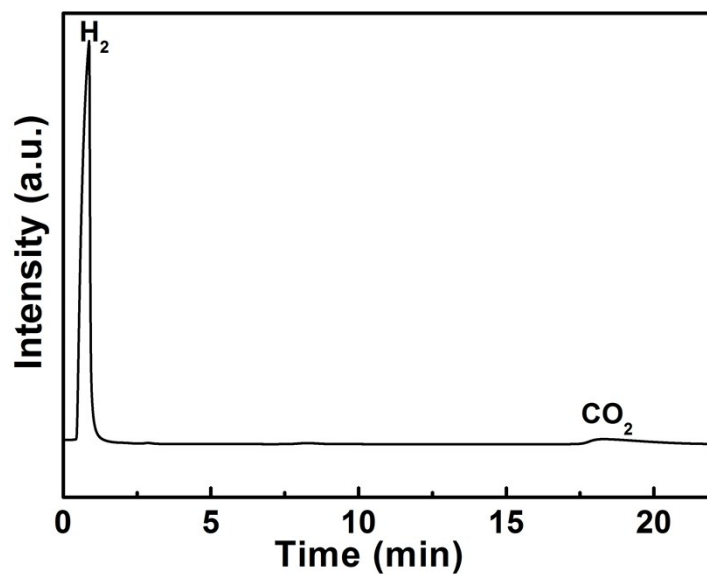

**Figure S9** GC spectrum using TCD for the evolved gas from FA (1 M, 10 mL) over D-Pd<sub>5</sub>Ag<sub>5</sub> NWs.

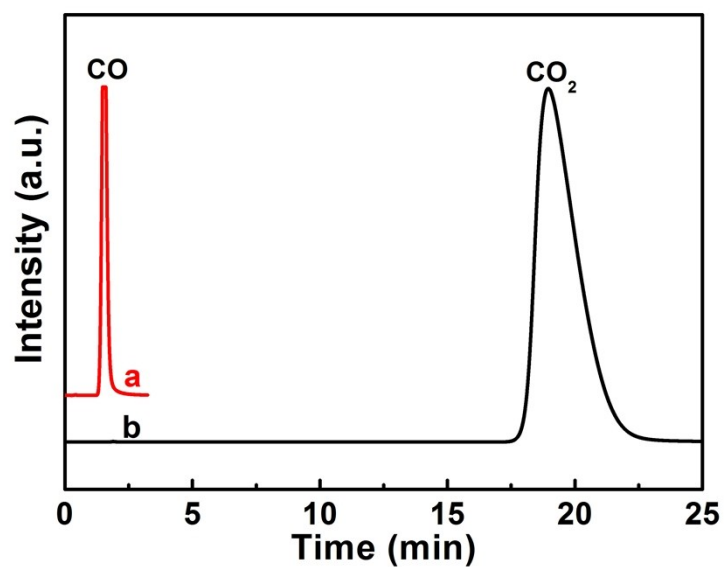

**Figure S10** GC spectrum using FID-Methanator for (a) commercial pure CO and (b) the evolved gas from FA (1 M, 10 mL) over D-Pd<sub>5</sub>Ag<sub>5</sub> NWs.



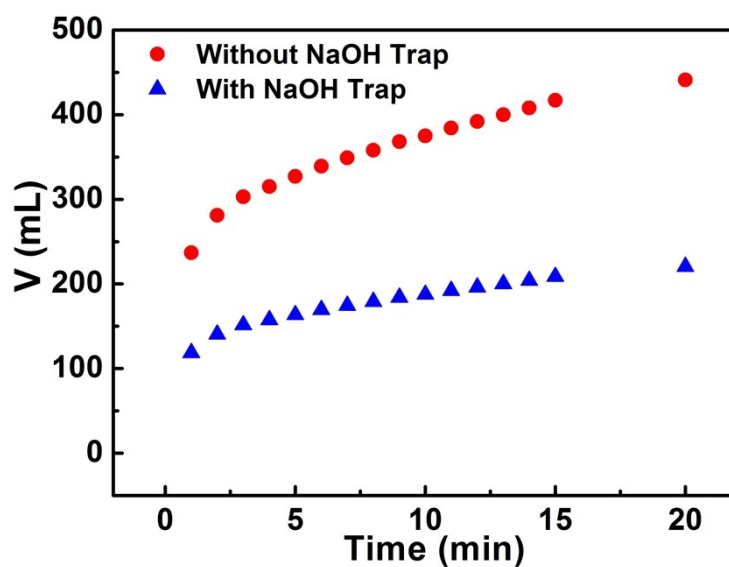

**Figure S11** The comparison of the volume of gas generated during D-Pd<sub>5</sub>Ag<sub>5</sub> NWs catalyzed dehydrogenation of aqueous FA solution (10 mL, 1 M) with and without NaOH trap.

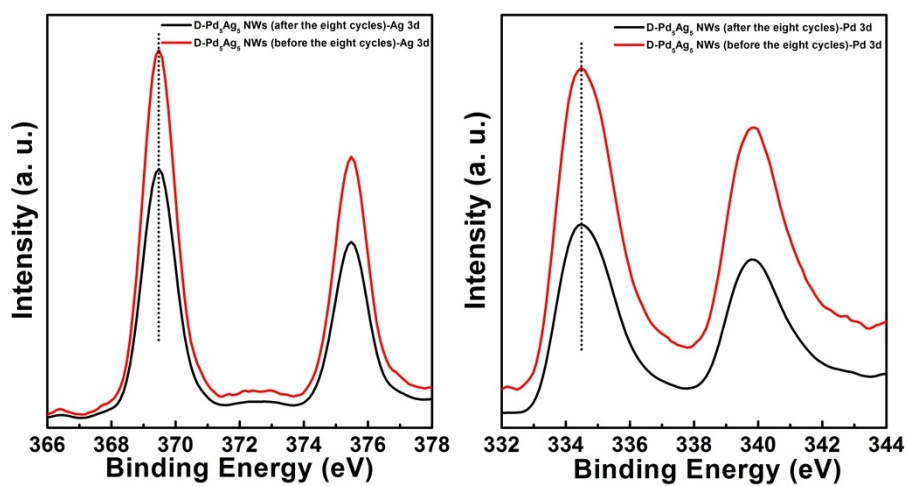

**Figure S12** The XPS data of the networked D-PdAg NWs before and after 8 cycles.

**Table S1** Elemental analysis result of the catalysts characterized by inductively coupled plasma-atomic emission spectroscopy (ICP-OES).

| Entry                                 | AgNO <sub>3</sub> /Pd(NO <sub>3</sub> ) <sub>2</sub> molar ratio | AgNO <sub>3</sub> /Pd(NO <sub>3</sub> ) <sub>2</sub> molar ratio of D-PdAg NWs |
|---------------------------------------|------------------------------------------------------------------|--------------------------------------------------------------------------------|
| D-Pd <sub>3</sub> Ag <sub>7</sub> NWs | 3.0:7.0                                                          | 3.0:6.95                                                                       |
| D-Pd <sub>5</sub> Ag <sub>5</sub> NWs | 5.0:5.0                                                          | 5.0:4.96                                                                       |
| D-Pd <sub>7</sub> Ag <sub>3</sub> NWs | 7.0:3.0                                                          | 7.0:2.98                                                                       |

**Table S2** Initial TOF (mol<sub>H<sub>2</sub></sub>·molcatalyst<sup>-1</sup>·h<sup>-1</sup>) values for the decomposition of FA over various heterogeneous catalysts.

| Catalyst                                  | FA(mmol) | Additive(mmol) | Tem.(K) | n <sub>Catalyst</sub> (mmol) | TOF <sub>initi</sub> | Recycle times | Ref.      |
|-------------------------------------------|----------|----------------|---------|------------------------------|----------------------|---------------|-----------|
| <b>Without support</b>                    |          |                |         |                              |                      |               |           |
| C-Pd <sub>5</sub> Ag <sub>5</sub> NWs     | 10.0     | None           | 298     | 0.100                        | 245                  | 6             | [1]       |
| D-Pd <sub>5</sub> Ag <sub>5</sub> NWs     | 10.0     | None           | 298     | 0.100                        | 430                  | 8             | This work |
| D-Pd <sub>5</sub> Ag <sub>5</sub> NWs     | 10.0     | None           | 323     | 0.100                        | 1600                 | 8             | This work |
| PdAg Nanosheets                           | 10.0     | HCOONa(5.0)    | 298     | 0.100                        | 156.0                | —             | [5]       |
| <b>With support</b>                       |          |                |         |                              |                      |               |           |
| Ag <sub>42</sub> Pd <sub>58</sub> /C      | 10.0     | None           | 323     | 0.100                        | <b>382.0</b>         | <b>4</b>      | [3]       |
| Ag@Pd/C                                   | 10.0     | None           | 293     | 0.200                        | <b>192.0</b>         | <b>2</b>      | [4]       |
| Ag <sub>0.1</sub> -Pd <sub>0.9</sub> /rGO | 5.0      | HCOONa (3.35)  | 298     | 0.100                        | <b>105.2</b>         | —             | [6]       |

“—, —”For comparison, the cycle property of catalyst was not tested.

**Table S3.** Elemental analysis result of the networked D-Pd<sub>5</sub>Ag<sub>5</sub> NWs catalysts characterized by inductively coupled plasma-atomic emission spectroscopy (ICP-OES).

| Entry | Before the four catalytic run | After the four catalytic run |
|-------|-------------------------------|------------------------------|
| 1     | Ag:Pd = 5.0:5.0               | Ag:Pd = 5.0:4.95             |

**Table S4.** Pd content analysis result by inductively coupled plasma-atomic emission spectroscopy (ICP-OES) in our catalytic system of liquid phase.

| Entry | Before the four catalytic run | After the four catalytic run |
|-------|-------------------------------|------------------------------|
| 1     | 0.0 ppm                       | 0.0 ppm                      |

### TOF<sub>initial</sub> Calculation methods:

$$x_a = \frac{P_{\text{atm}} V_{\text{H}_2} / RT}{n_{\text{FA}}} \quad \text{S1f}$$

Where  $x_a$  is conversion,  $P_{\text{atm}}$  is the atmospheric pressure,  $V_{\text{H}_2}$  is the final generated volume of  $\text{H}_2$ ,  $R$  is the universal gas constant,  $T$  is room temperature (298 K), and  $n_{\text{FA}}$  is the mole number of FA.

$$\text{TOF}_{\text{initial}} = \frac{P_{\text{atm}} V_{\text{H}_2} / RT}{n_{\text{Ag} + \text{Pd}} t} \quad \text{S2}$$

Where  $\text{TOF}_{\text{initial}}$  is initial turnover frequency,  $V_{\text{H}_2}$  is the generated volume of  $\text{H}_2$  during the first 20 min of the reaction,  $n_{\text{Ag} + \text{Pd}}$  is the mole number of the Ag and Pd, and  $t$  is the reaction time of 20 min.

### 3. Supplementary references

- [1] Liu, H., Huang B. L., Zhou J. H., Wang K., Yu, Y. Y., Yang, W. W., Guo, S. J., *J. Mater. Chem. A*, 2018, **6**, 1979-1984.
- [2] X. Gu, Z. H. Lu, H. L. Jiang, T. Akita, and Q. Xu, *J. Am. Chem. Soc.* **2011**, *133*, 11822-11825.
- [3] S. Zhang, önder Metin, D. Su, S. H. Sun, *Angew. Chem. Int. Ed.* **2013**, *125*, 3769-3772.
- [4] K. Tedsree, T. Li, S. Jones, C. W. A. Chan, K. M. K. Yu, P. A. J. Bagot, E. A. Marquis, G. D. W. Smith, S. C. E. Tsang, *Nat. Nanotech.* **2011**, *6*, 302-307.
- [5] C. Y. Hu, X. L. Mu, J. M. Fan, H. B. Ma, X. J. Zhao, G. X. Chen, Z. Y. Zhou, N. F. Zheng, *Chem. Nano. Mat.* **2016**, *2*, 28-32.
- [6] Y. Ping, J. M. Yan, Z. L. Wang, H. L. Wang, Q. Jiang, *J. Mater. Chem. A* **2013**, *1*, 12188-12191.
